# Supplementary material for: Gut Dysbiosis in Patients with Anorexia Nervosa
Source: PubMed Central journal article supplement (PMC4687631; doi:10.1371/journal.pone.0145274), 2015-12-18
Supplement: pone.0145274.s001.pdf [file pone.0145274.s001.pdf]

**S1 Table. Sequences of the primers and detection limits of each bacterium**

| Target bacteria                         | Primer      | Sequence (5' - 3')             | Detection limits<br>(Log <sub>10</sub> /g feces) | Reference<br>No. |
|-----------------------------------------|-------------|--------------------------------|--------------------------------------------------|------------------|
| <i>Clostridium coccooides</i> group     | g-Ccoc-F    | AAATGACGGTACCTGACTAA           | 5.0                                              | 1                |
|                                         | g-Ccoc-R    | CTTTGAGTTTCATTCTTGGCAA         |                                                  |                  |
| <i>Clostridium leptum</i> subgroup      | sg-Clept-F  | GCACAAGCAGTGGAGT               | 5.0                                              | 1                |
|                                         | sg-Clept-R3 | CTTCCTCCGTTTTGTCAA             |                                                  |                  |
| <i>Bacteroides fragilis</i> group       | g-Bfra-F2   | AYAGCCTTCGAAAGRAAGAT           | 5.0                                              | 2                |
|                                         | g-Bfra-R    | CCAGTATCAACTGCAATTTTA          |                                                  |                  |
| <i>Bifidobacterium</i>                  | g-Bifid-F   | CTCCTGGAAACGGGTGG              | 5.0                                              | 3                |
|                                         | g-Bifid-R   | GGTGTCTTCCCGATATCTACA          |                                                  |                  |
| <i>Atopobium</i> cluster                | g-Atopo-F   | GGGTTGAGAGACCGACC              | 5.9                                              | 1                |
|                                         | g-Atopo-R   | CGGRGCTTCTTCTGCAGG             |                                                  |                  |
| <i>Prevotella</i>                       | g-Prevo-F   | CACRGTAAACGATGGATGCC           | 5.1                                              | 1                |
|                                         | g-Prevo-R   | GGTCGGGTTGCAGACC               |                                                  |                  |
| <i>Enterobacteriaceae</i>               | En-Isu-3F   | TGCCGTAAC TTCGGGAGAAGGCA       | 3.9                                              | 7                |
|                                         | En-Isu-3'R  | TCAAGGACCAGTGTTCAGTGC          |                                                  |                  |
| <i>Enterococcus</i>                     | g-Encoc-F   | ATCAGAGGGGATAACACTT            | 3.0                                              | 5                |
|                                         | g-Encoc-R   | ACTCTCATCCTTGTCTTCTC           |                                                  |                  |
| <i>Staphylococcus</i>                   | g-Staph-F   | TTTGGGCTACACACGTGCTACAATGGACAA | 3.0                                              | 5                |
|                                         | g-Staph-R   | AACAAC TTTATGGGATTTGCWTGA      |                                                  |                  |
| <i>Streptococcus</i>                    | g-Str-F     | AGCTTAGAAGCAGCTATTCATTC        | 3.0                                              | 8                |
|                                         | g-Str-R     | GGATACACCTTTCGGTCTCTC          |                                                  |                  |
| <i>Clostridium difficile</i>            | Cd-Isu-F    | GGGAGCTTCCCATACGGGTTG          | 2.4                                              | 4                |
|                                         | Cd-Isu-R    | TTGATGCCTCAATGCTTGGGC          |                                                  |                  |
| <i>Clostridium perfringens</i>          | s-Clper-F   | GGGGGTTTCAACACCTCC             | 2.3                                              | 5                |
|                                         | CIPER-R     | GCAAGGGATGTCAAGTGT             |                                                  |                  |
| <i>Lactobacillus gasseri</i> subgroup   | sg-Lgas-F   | GATGCATAGCCGAGTTGAGAGACTGAT    | 2.7                                              | 5                |
|                                         | sg-Lgas-R   | TAAAGGCCAGTTACTACCTCTATCC      |                                                  |                  |
| <i>Lactobacillus reuteri</i> subgroup   | sg-Lreu-F   | GAACGCAYTGGCCCAA               | 3.0                                              | 5                |
|                                         | sg-Lreu-R   | TCCATTGTGGCCGATCAGT            |                                                  |                  |
| <i>Lactobacillus ruminis</i> subgroup   | sg-Lrum-F   | CACCGAATGCTTGCAYTACC           | 2.3                                              | 5                |
|                                         | sg-Lrum-R   | GCCGCGGGTCCATCCAAAA            |                                                  |                  |
| <i>Lactobacillus plantarum</i> subgroup | sg-Lpla-F   | CTCTGGTATTGATTGGTGCTTGCAT      | 2.6                                              | 5                |
|                                         | sg-Lpla-R   | GTTCCGCACTCACTCAAATGTAATA      |                                                  |                  |
| <i>Lactobacillus sakei</i> subgroup     | sg-Lsak-F   | CATAAAACCTAMCACC GCATGG        | 2.9                                              | 5                |
|                                         | sg-Lsak-R   | TCAGTTACTATCAGATACRTTCTTCTC    |                                                  |                  |
| <i>Lactobacillus casei</i> subgroup     | sg-Lcas-F   | ACCGCATGGTTCTTGGC              | 3.5                                              | 5                |
|                                         | sg-Lcas-R   | CCGACAACAGTTACTCTGGC           |                                                  |                  |
| <i>Lactobacillus brevis</i>             | s-Lbre-F    | ATTTTGTGTTGAAAGGTGGCTTCGG      | 2.6                                              | 5                |
|                                         | s-Lbre-R    | ACCCTTGAACAGTTACTCTCAAAGG      |                                                  |                  |
| <i>Lactobacillus fermentum</i>          | LFer-1      | CCTGATTGATTTTGGTCGCCAAC        | 4.0                                              | 5                |
|                                         | LFer-2      | ACGTATGAACAGTTACTCTCATACGT     |                                                  |                  |

**References**

1. Matsuki T, Watanabe K, Fujimoto J, et al. Use of 16S rRNA gene-targeted group-specific primers for real-time PCR analysis of predominant bacteria in human feces. *Appl Environ Microbiol.* 2004;70(12):7220-7228.
2. Matsuki T. Development of quantitative PCR detection method with 16S rRNA gene-targeted genus- and species-specific primers for the analysis of human intestinal microflora and its application. *Nippon Saikingaku Zasshi.* 2007; 62(2): 255-261
3. Matsuki T. Phylogenetic Relationship of Predominant Bacteria in Human Intestinal Bacteria Based on the 16S rRNA Gene Sequence. *J Intestinal Microbiol.* 2008;22: 253-261
4. Matsuda K, Tsuji H, Asahara T, Takahashi T, Kubota H, Nagata S, Yamashiro Y, Nomoto K. Sensitive quantification of *Clostridium difficile* cells by reverse transcription-quantitative PCR targeting rRNA molecules. *Appl Environ Microbiol.* 2012 Aug;78(15):5111-8.
5. Matsuda K, Tsuji H, Asahara T, Kado Y, Nomoto K. Sensitive quantitative detection of commensal bacteria by rRNA-targeted reverse transcription-PCR. *Applied and environmental microbiology* 2007; 73(1): 32-39.
6. Kikuchi E, Miyamoto Y, Narushima S, et al. Design of species-specific primers to identify 13 species of *Clostridium* harbored in human intestinal tracts. *Microbiol Immunol.* 2002;46(5):353-358.
7. Matsuda K, Tsuji H, Asahara T, Matsumoto K, Takada T, Nomoto K. Establishment of an analytical system for the human fecal microbiota, based on reverse transcription-quantitative PCR targeting of multicopy rRNA molecules. *Applied and environmental microbiology* 2009;
8. Sakaguchi S, Saito M, Tsuji H, Asahara T, Takata O, Fujimura J, Nagata S, Nomoto K, Shimizu T. Bacterial rRNA-targeted reverse transcription-PCR used to identify pathogens responsible for fever with neutropenia. *J Clin Microbiol* 2010;48(5):1624-8.
